# Supplementary material for: JAXA Level 2 cloud and precipitation microphysics retrievals based on EarthCARE CPR, ATLID and MSI
Source: Copernicus journal article supplement (doi:10.5194/amt-2024-99), 2024-06-11
Supplement: Supplementary file [file amt-2024-99-AC1-supplement.pdf]

Review "JAXA Level 2 cloud and ..." by Kaori Sato et al.

The paper provides a high-level summary of JAXA level 2 cloud and precipitation microphysical property products, which can help users effectively select suitable products for research and application in the future. The paper is well organized and presented. However, as I commented below, a few aspects could be improved.

We are sincerely grateful to all reviewers for their careful reading of the manuscript and useful comments that have allowed us to improve its quality. In our revised manuscript, we have made corrections and added subsections in section 2 to provide a better overview of the products and major details of the algorithms and products based on comments by the reviewers. Below are the reviewers' comments in blue text followed by our replies in black text.

Major issues:

1. EarthCARE radar provides Doppler velocity measurements, the sum of hydrometeor falling speed and air vertical velocity. The potential of providing air vertical velocity estimation in convective clouds is exciting. The paper used several names to discuss air vertical velocity. For example, in the first paragraph, 'vertical velocity' and 'air motion' refer to the same parameter (to my understanding). But we think about 'air motion' in 3-D. In Table 1, you list the "Cloud air velocity" product, better called "Air vertical velocity." It will be great to use a consistent statement for retrieved air vertical velocity in the paper.

We have improved the manuscript by using the term "air vertical velocity" throughout the paper and in Table 1.

2. It would be beneficial to provide a paragraph or two in section 2.1 to place JAXA level 2 cloud products in the context of space-based multi-sensor cloud remote sensing and the reasoning for three cloud products. Although it is not possible to go into details of each algorithm, it could be helpful to provide a high-level summary of available information and challenges, general approaches, and additional information used to constrain retrievals to help readers better understand uncertainties in the products.

Following the reviewer's suggestion, we have explained the rationale for using three cloud products and a high-level summary of the JAXA L2 cloud microphysics algorithms in Section 2.1. These additions to subsections 2.1.2 (Rationale for producing three products) and 2.1.3 (Summary of available information, challenges, general approaches, and additional information used to constrain retrievals) provide a better overview of the products. We have further improved the description of our general approach to microphysics retrieval in Section 2.3.

The following subsections has been added in the paper:

"2.1.2 Rationale for producing three products

The CPR standalone (CPR) algorithm is considered to produce the simplest and most stable products, which are not affected by the observation and retrieval performance of other sensors, but with relatively higher uncertainty due to the small number of observables. The CPR-ATLID synergy (AC) cloud algorithm, and the CPR-ATLID-MSI (ACM)

algorithm are generally considered to produce more reliable estimates of cloud microphysics and can handle more complicated scenes in terms of cloud phase with more observables and greater sensitivity. Notably, the degree of improvement in multi-sensor retrievals can be affected by many factors (e.g., day/night differences in ATLID and MSI observations).

The JAXA L2 cloud microphysics algorithms for the CPR standalone, 2-sensor, and 3-sensor synergy products share the same basic algorithms and assumptions. Less synergetic algorithms are developed and trained with more synergetic algorithms (e.g., the CPR standalone algorithm relative to 2- and 3-sensor algorithms, and the 2-sensor algorithm relative to the 3-sensor algorithm). A comparison of the three products and careful investigation of the causes underlying differences in the retrieval results according to different synergy levels will contribute to the development of better algorithms and more reliable global cloud microphysical products. The release of these three products by JAXA supports the development of retrieval algorithms allowing for the consistent treatment and integration of comprehensive long-term, spatially dense observations from active sensors on various platforms with differing sensitivity levels to create homogenous microphysics data. Collocated lidar and cloud radar measurements will not always be possible in future missions; therefore, single-sensor algorithms that are consistent with synergetic algorithms are needed (e.g., to process cloud radar data from CloudSat, EarthCARE, and future missions with single CPR measurements)

### 2.1.3. Summary of available information, challenges, general approaches, and additional information used to constrain retrievals

For cloud microphysics, CPR\_CLP and ACM\_CLP share the same basic algorithm architecture as AC\_CLP, whereas in CPR\_CLP, the ATLID observables are simulated based on observations to drive AC\_CLP-like retrieval. ACM\_CLP has additional steps to handle inputs from the MSI. Further, the framework of ice and water microphysics retrieval algorithms have similar structure. For these algorithms, a maximum of two size modes in each JSG are used to treat coexistence of cloud ice and snow in the ice phase, cloud liquid and ice (or snow) in the mixed phase, and cloud liquid and liquid precipitation in the liquid phase. Cloud ice microphysics are generally retrieved by CPR-ATLID synergy, whereas ice and liquid precipitation are often retrieved by CPR alone due to the attenuation of ATLID signals, and cloud liquid is retrieved through either ATLID-only or CPR-only retrieval schemes, as lidar and cloud radar are considered to be sensitive to different portions of the particle size distribution, particularly for water clouds.

Cloud microphysics retrieval in CPR-only regions involves challenges in producing effective radius ( $r_{\text{eff}}$ ) and ice water content (IWC) or liquid water content (LWC) solely from radar reflectivity ( $Z_e$ ) constrained by pulse-integrated attenuation (PIA) when Doppler velocity is not used. The dependence of  $Z_e$  on cloud microphysical properties reflects cloud physical processes (e.g., Khain et al., 2008). A single size mode cannot explain the transition stage between cloud and precipitation (Krasnov and Russchenberg, 2002). Therefore, a methodology to consider two size modes in each JSG is developed for a better interpretation of  $Z_e$  profiles in both ice- and liquid-clouds.  $Z_e$  is less sensitive to cloud particles in the presence of large particles, and the additional information of MSI optical thickness is effective for constraining cloud  $r_{\text{eff}}$  and LWC (or IWC) derived from AC\_CLP in the ACM\_CLP scheme. For CPR\_CLP, the same microphysics retrieval scheme employed by AC\_CLP for the CPR-only detected cloud region is used. To run the AC\_CLP scheme, the

statistical relationships between lidar observables and  $Z_c$  for the water and ice phases are derived from CALIPSO and CloudSat long-term observations and applied to create ATLID-like observations (Okamoto et al., 2020) as a function of  $Z_c$  that is fully attenuated in optically thick regions, realistically recreating observations. The current version of ATLID-like inputs will be replaced by inputs directly derived from ATLID and CPR observations. Currently, the ATLID-like input is used for only for the ice phase. For liquid cloud microphysics, ATLID-only and CPR-only retrievals are obtained and combined in the AC\_CLP algorithm due to the differing sensitivity of the sensors to cloud particle size. For CPR\_CLP, the CPR-only retrieval without the ATLID-like input is conducted for liquid cloud microphysics.

### 2.3.2 Cloud microphysics

In CPR\_CLP, ACP\_CLP, and ACM\_CLP, forward models corresponding to the derived cloud particle categories are used to analyze the observations from each sensor, and microphysics corresponding to each category are thus obtained. The single scattering properties of ice particles with various shapes and orientations are calculated using physical optics (Borovoi et al., 2012) and modified geometrical optics integral equation methods (Masuda et al., 2012) for ATLID specification (Okamoto et al., 2019), and discrete dipole approximation and finite-difference time domain (FDTD) methods for CPR wavelength (Sato et al., 2011; Ishimoto et al., 2008, 2012); Mie theory is used for the liquid phase and multiple scattering effects are estimated based on Sato et al. (2018, 2019).

The total effective radius for cloud and precipitation information is given as:

$$r_{\text{eff}} = \int r_{\text{eq}}^3 \frac{dn(r_{\text{eq}})}{dr_{\text{eq}}} dr_{\text{eq}} / \int r_{\text{eq}}^2 \frac{dn(r_{\text{eq}})}{dr_{\text{eq}}} dr_{\text{eq}} \quad (1)$$

where  $r_{\text{eq}}$  is the melted mass equivalent radius to a sphere,  $dn/dr_{\text{eq}}$  is the size distribution function. For both ice- and liquid-phase clouds, a maximum of two different particle size distributions ( $i=1,2$ ) can be considered within one JSG grid to handle the presence of cloud and precipitation modes, i.e.,  $\frac{dn(r_{\text{eq}})}{dr_{\text{eq}}} = \sum_{i=1}^2 \frac{dn_i(r_{\text{eq}})}{dr_{\text{eq}}}$ . The corresponding effective radius is given as:

$$r_{\text{eff},i} = \int r_{\text{eq}}^3 \frac{dn_i(r_{\text{eq}})}{dr_{\text{eq}}} dr_{\text{eq}} / \int r_{\text{eq}}^2 \frac{dn_i(r_{\text{eq}})}{dr_{\text{eq}}} dr_{\text{eq}} \quad (i = 1,2) \quad (2)$$

For  $dn_i/dr_{\text{eq}}$ , a modified gamma size distribution,

$$\frac{dn_i(r_{\text{eq}})}{dr_{\text{eq}}} = \frac{N_{o,i}}{\Gamma(p)r_{m,i}} \left(\frac{r_{\text{eq}}}{r_{m,i}}\right)^{p-1} \exp\left(-\frac{r_{\text{eq}}}{r_{m,i}}\right) \quad (i = 1,2) \quad (3)$$

in which  $r_m$  is the characteristic radius and the dispersion value is  $p = 2$  (Okamoto, 2002; Sato and Okamoto, 2011), is employed for cloud ice, snow, and rain in cold precipitation. A log-normal size distribution,

$$\frac{dn_i(r_{\text{eq}})}{dr_{\text{eq}}} = \frac{N_{o,i}}{\sqrt{2\pi}r_{\text{eq}}\ln\sigma} \exp\left\{-\frac{[\ln(r_{\text{eq}}/r_{o,i})]^2}{2(\ln\sigma)^2}\right\} \quad (i = 1,2) \quad (4)$$

in which  $r_o$  is the mode radius and the standard deviation of the distribution is  $\sigma = 1.5$  (Okamoto, 2002), is assumed for warm water, super-cooled liquid, and warm precipitation.

In the following, general approaches for cloud microphysics retrievals are explained based on the AC\_CLP cloud

microphysics algorithm, which are common to CPR\_CLP and ACM\_CLP cloud microphysics algorithms.

### 2.3.2.1 Ice cloud microphysics

For ice clouds, a lidar-only cloud region, lidar–radar overlap cloud region, and radar-only region generally exist for ice and liquid precipitation. An algorithm to retrieve microphysical properties that considers a mixture of two particle types at maximum (i.e., 2D and 3D ice) has been developed for ice cloud regions observed with CloudSat and CALIPSO synergy (Okamoto et al., 2010) using  $Z_e$ , the attenuated backscattering coefficient  $\beta$ , and the depolarization ratio. A framework to extend the applicability of the microphysics retrieval algorithm from the cloud region to the entire precipitation region in the vertical column was developed to efficiently reflect information from the lidar–radar overlap region to the microphysics retrieved in the CloudSat- or CALIPSO-only region (Sato et al., 2011, 2020). The relationships between microphysical properties ( $r_{\text{eff}}$  and IWC) and  $\beta$  or  $Z_e$  in the vertical cloud grids of the lidar–radar overlap region were derived for each profile and used to estimate the microphysical properties in the radar- or lidar-only cloud region (Sato et al., 2011). The EarthCARE JAXA L2 cloud microphysics retrieval algorithms extend these algorithms in the following three aspects: (1) the spatial variability of the microphysics and observables are considered to derive more reliable relationships among cloud microphysics and observables, (2) the microphysics estimates in the ice precipitation region far from the lidar–radar overlap region of a precipitation system are further improved by extending the microphysics estimates from the precipitation region upward rather than downward from the lidar–radar region (Heymsfield et al., 2018), and (3) single-size mode for cloud ice is considered for lidar-only cloud region and lidar–radar overlap cloud region, while two different size modes for cloud ice and ice precipitation (snow) are considered for the CPR-only region existing from the bottom altitude of the lidar–radar overlap region to the top altitude of the melting level. The PIA is used to correct the attenuation of  $Z_e$ . (Iguchi et al., 2000).

Specifically, for (1), the L2 cloud microphysics algorithm uses  $r_{\text{eff}}$  and IWC for all horizontal and vertical grids within the radar–lidar overlap region embedded in each cloud system to obtain robust relationships of cloud microphysics with  $Z_e$  and  $\beta$  (e.g.,  $Z_e$ –IWC relationships,  $Z_{e,1} = a_1 \text{IWC}_1^{b_1}$  are determined for each record, where  $Z_e$  [ $\text{mm}^6 \text{m}^{-3}$ ] and IWC [ $\text{g m}^{-3}$ ]). These relationships are derived for each record using all data within each cloud system (or within a single EarthCARE orbit frame when a sufficient number of points cannot be obtained to derive the statistics) weighted by distance from the target profile record and are used to provide initial estimates of cloud ice microphysics based on  $Z_e$  or  $\beta$  in the CPR-only (ice cloud and ice precipitation) or ATLID-only (ice cloud) regions, respectively.

For (2), the relationship between the microphysics and observables is expected to change from the cloud region to the precipitation region. Because lidar signals are fully attenuated at optically thick precipitation region, new relationships for ice precipitation are derived using CPR data. In this process, CPR data at melting levels or layers around the ice–liquid interfaces of a precipitation system are used. At the top of the melting level, it is assumed that only precipitation mode exists ( $Z_e = Z_{e,2}$ ), and during melting, the mass in each size bin (i.e.,  $r_{\text{eff}}$ ) remains constant across several successive layers (Heymsfield et al., 2018). For a given  $r_{\text{eff}}$ ,  $\text{dBZ}_e$  changes due to the different scattering properties for ice and liquid. Therefore,  $r_{\text{eff}}$  and IWC (or LWC) are derived and the relationships ( $Z_{e,2} = a_2 \text{IWC}_2^{b_2}$ ) can be established for ice precipitation (snow) holding the coefficient  $b_2$  at the value derived in (1) ( $b_2 = b_1$ ) for each record.

For (3),  $Z_{e,1}$  and  $Z_{e,2}$  for the two size modes (cloud ice and snow) in the CPR-only ice precipitation region at each vertical grid ( $Z_{e,1} + Z_{e,2} = Z_e$ ) are determined as follows. The ratio  $IWC_2/(IWC_1+IWC_2) = IWC_2/IWC = A$  increases linearly from 0 at the bottom of the lidar–radar overlap region to 1 at the top of the melting level.  $A$  is given as,  $A = \int_h^{ht} Z_e dh / \int_{h_m}^{ht} Z_e dh$ , with a range of 0 to 1, where the integrated  $Z_e$  from the bottom altitude of the lidar–radar overlap region ( $h_t$ ) to a certain altitude  $h$  below  $h_t$  within the CPR-only ice precipitation region ( $\int_h^{ht} Z_e dh$ ) is normalized using the value integrated to the melting level altitude  $h_m$  ( $\int_{h_m}^{ht} Z_e dh$ ). As the  $Z_e$ –IWC relationships for both cloud ice and snow are derived, determining the vertical profile of  $IWC_2/IWC$  is equivalent to providing the relationship between  $Z_{e,1}$  and  $Z_{e,2}$  for each vertical grid. Therefore  $IWC_i, r_{eff,i}$  ( $i=1,2$ ) and other microphysical properties are derived for each JSG grid (Table 1).

In microphysics retrieval for convective/stratiform rain below the melting level, only the precipitation size mode is assumed to exist. The  $r_{eff}$  and LWC obtained at the rain top altitude of each observation record described in (2) are used to derive the  $No$  and  $x$  values of the Marshall–Palmer size distribution ( $dn/dD = No e^{-\Lambda D} [m^{-4}]$ , where  $D$  is the particle diameter,  $\Lambda = xR^{0.21} [cm^{-1}]$  and  $R$  is the rain rate in mm/hr, which is a function of LWC and  $r_{eff}$ ) (Marshall and Palmer, 1948).  $No$  and  $x$  are assumed to be constant within the vertical profile for rain in a given record and are used to determine the vertical profiles of LWC and  $r_{eff}$  for the modified gamma size distribution associated with each  $Z_e$  value in the rain region.

Generally, for the same  $Z_e$ , when the mass mixing ratio of the small mode to total IWC is overestimated (underestimated), optical thickness will be overestimated (underestimated); in the 3-sensor ACM\_CLP algorithm, the mass mixing ratio of the two size modes is further constrained by the optical thickness obtained from the MSI. When only a single size mode is present, the  $r_{eff}$  and IWC of the single mode are adjusted to be consistent with MSI optical thickness retrievals. Doppler velocity is expected to effectively improve particle sizing in regions of ice and liquid precipitation, as well as in the breakup of large snow particles during melting (e.g., Fujiyoshi et al., 2023).

### 2.3.2.2 Liquid cloud microphysics

A two-size-mode approach similar to the ice cloud microphysics retrieval process is used for water clouds, which considers the coexistence of cloud particles and drizzle. CPR\_CLP derives the liquid microphysics corresponding to each size mode from CPR-only scheme. In AC\_CLP and ACM\_CLP, for JSG grids with ATLID observables, ATLID  $\delta$  and  $\beta_{att}$  (or  $\sigma_{ext}$ ) are used to derive  $r_{eff,1}$  and  $LWC_1$  for cloud water or super-cooled water (Sato et al., 2018, 2019; Sato and Okamoto, 2020). As ATLID is expected to provide a better estimate of the cloud mode than CPR, for the CPR and ATLID overlap region, the ATLID cloud microphysics and  $Z_{e,1}$  estimate are used for microphysics estimation of the drizzle mode.

In water clouds, *in situ* and ground-based radar measurements have shown that cloud particles and drizzle-sized particles can coexist above  $-35$  dBZ<sub>e</sub> (Baedi et al., 2000). Except at very small ( $< -35$  dBZ<sub>e</sub>) and large values of  $Z_e$ , where only a single mode is likely to occur, the cloud mode can dominate LWC and  $r_{eff}$ , whereas the precipitation mode can dominate  $Z_e$  (Baedi et al., 2000; Krasnov and Russchenberg, 2005). For this reason, in general, the dependence of total LWC on  $Z_e$  differs significantly from results derived for only cloud particles ( $LWC_1$  and  $Z_{e,1}$ ) or only drizzle-sized particles ( $LWC_2$  and  $Z_{e,2}$ ) (Baedi et al., 2000). PIA is sensitive to total LWC, and in the CPR-only microphysics retrieval

scheme, the  $Z_c$ -LWC relationship ( $Z_c = aLWC^b$ , where  $Z_c$  [ $\text{mm}^6 \text{m}^{-3}$ ] and LWC [ $\text{g m}^{-3}$ ]) and LWC for the cloud+drizzle mode for the JSG grids within each record are determined from PIA and  $Z_c$  assuming that  $b = 5.17$  (Baedi et al., 2000). The power  $b_i$  of the  $Z_c$ -LWC relationship for clouds and drizzles are reported to have similar values and assumed to be fixed (i.e.,  $b_1 \sim 1.17$ ; Baedi et al., 2000, Fox and Illingworth, 1997,  $b_2 \sim 1.58$ ; Krasnov and Russchenberg, 2002), while the coefficients  $a_i$  in the  $Z_c$ -LWC relationship could differ between clouds and drizzles by several orders of magnitude reflecting the size distribution difference (Khain et al., 2008). As CPR  $Z_c$  is more sensitive to the drizzle mode (i.e.,  $Z_{e,2}$ ), the  $a_1$  coefficient for cloud mode is assumed to be initially fixed at reported value ( $a_1 = 0.015$ ; Baedi et al., 2000), and  $a_2$  is derived for each  $Z_c$  and LWC profile, given that  $LWC_1 + LWC_2 = LWC$  and  $Z_{e,1} + Z_{e,2} = Z_c$ . Finally,  $Z_{e,i}$ ,  $r_{\text{eff},i}$ ,  $LWC_i$  ( $i=1,2$ ), and other microphysical properties such as the number concentration and particle fall speed are derived for the two size modes.

The liquid cloud microphysics are further constrained by the ATLID observables for the AC\_CLP and ACM\_CLP algorithms, and the MSI for the ACM\_CLP algorithm. Doppler information will be used to improve the microphysics estimates of the precipitation (drizzle) mode.“

3. About processing flow (Section 2.2): The processing flow given in Fig. 1 is helpful in understanding the relationships among the three products. However, parameters under the two horizontal arrows could be better described in the text and positioned in the figure. In the summary, three processing chains (L2a, L2b, L2c) are mentioned but could be discussed in this section.

Figure 1 has been improved, and corresponding text explaining the connections (inputs and outputs) of the three processing chains has been added to Section 2.2 (Processing flow of the JAXA Level 2 cloud microphysics product) as:

“The L2 cloud algorithms are processed in the following order: CPR\_CLP, AC\_CLP, and ACM\_CLP. The cloud mask, cloud type, and cloud particle category products from each algorithm are passed to the high-order synergy algorithms. The CPR-only cloud mask, cloud type, and cloud particle category products from L2a CPR\_CLP are input to the L2b AC\_CLP algorithm, and these CPR-only derived products are combined with the ATLID-only cloud mask, cloud type, and cloud particle category to produce synergy CPR-ATLID products. These products are then applied to the AC\_CLP algorithm to derive cloud microphysics products. The AC\_CLP cloud mask, cloud type, and cloud particle category products are further passed to the ACM\_CLP algorithm and used for 3-sensor microphysics retrieval. The MSI is not currently used to improve the cloud mask, type, and category products; therefore, these products from ACM\_CLP are the same as those from AC\_CLP.”

Minor issues:

1. Line 24: add " and cloud dynamics" after "hydrometer formation"

We added " and cloud dynamics".

2. Line 42: Does "the EarthCARE L2" mean JAXA L2 here?

Yes. We corrected it to "EarthCARE JAXA L2".

3. Line 102-104: This sentence could be incorrectly stated. Do you mean that ATLID-based results are used to train a CPR-based algorithm to provide retrievals in regions with CPR only measurements?

Yes. We have rephrased it as; ATLID-only CPC is used to train the CPR-based algorithm for ice particle category retrieval from  $Z_c$  and temperature information in regions with CPR-only measurements. (Line 193-194)

4. Line 129: "Eight frames" and "15 frames" are inconsistent here. One of the "frames" needs to be replaced with a different word.

Eight frames represent one orbit, and we used 15 frames for evaluation, corresponding to nearly two orbits. We have clarified this information in the text as, "The simulated L1 data for an EarthCARE orbit are divided into eight frames, and 15 frames, corresponding to nearly 2 orbits, are simulated to include representative cloud and aerosol scenes around the world." (Line 320-321)

5. In Figure 3, there are fewer clouds horizontally in simulated ATLID measurements, which is puzzling because ATLID should be more sensitive to CPR in cloud detection.

The ATLID L2a cloud backscatter product for the cloud scenes in this study (Figure 3) is processed by the JAXA L2 ATLID algorithm (Nishizawa et al., 2024). Nishizawa et al., (2024) applied the JAXA ATLID L2 feature mask algorithm to the simulated EarthCARE L1 data and found that the cloud mask scheme appeared to reasonably extract cloudy pixels from the original output of ATLID signals produced by the model. The misidentification of the cloud layers was relatively low (approximately 10%). The effective radius/ice water content of the simulated ice clouds in Figure 3 were sometimes relatively large/small near cloud tops (Figures 4 and 5), and the corresponding ATLID backscattering coefficient could be weak to be detected.

Nishizawa, T., Kudo, R., Oikawa, E., Higurashi, A., Jin, Y., Sugimoto, N., Sato, K., and Okamoto, H.: Algorithm to retrieve aerosol optical properties using lidar measurements on board the EarthCARE satellite, Atmos. Meas. Tech. Discuss. [preprint], <https://doi.org/10.5194/amt-2024-100>, in review, 2024.

6. Figure 3 caption: add "(left column)" after "Ze measurements" and "(right column)" after "product" to better separate CPR and ATLID measurements.

We included them.

7. The layout of different panels between simulations and retrieval for Fig. 6 differs from Figs. 4 and 5. It would be better if they were consistent.

The layout of Fig.6 is modified to be consistent with Figs.4 and 5.

8. Line 182: Fig. 7b and Fig. 7c should be switched.

Fig. 7b and Fig. 7c are switched.

9. Line 218: change "Doppler information" to "radar Doppler velocity measurements".

We have changed it.

Thank you for your suggestions.
